# Supplementary material for: Novel high-entropy layered double hydroxide microspheres as an effective and durable electrocatalyst for oxygen evolution
Source: Royal Society of Chemistry journal article supplement (doi:10.1039/d3ta01454a), 2023-01-01
Supplement: d3ta01454a1.pdf [file d3ta01454a1.pdf]

# Electronic Supporting Information

## **Novel high-entropy layered double hydroxide microspheres as effective and durable electrocatalyst for oxygen evolution**

**Shun Li<sup>a</sup>, Likai Tong<sup>a</sup>, Zhijian Peng<sup>b,\*</sup>, Bo Zhang<sup>a</sup> and Xiuli Fu<sup>a,\*</sup>**

*<sup>a</sup> School of Integrated Circuits, Beijing University of Posts and Telecommunications, Beijing 100876, P. R. China*

*<sup>b</sup> School of Science, China University of Geosciences, Beijing 100083, P. R. China*

### **Corresponding authors**

*\* Telephone: 86-10-62282452. Fax: 86-10-62282054*

*E-mail: xiulifu@bupt.edu.cn (X. Fu) and pengzhijian@cugb.edu.cn*

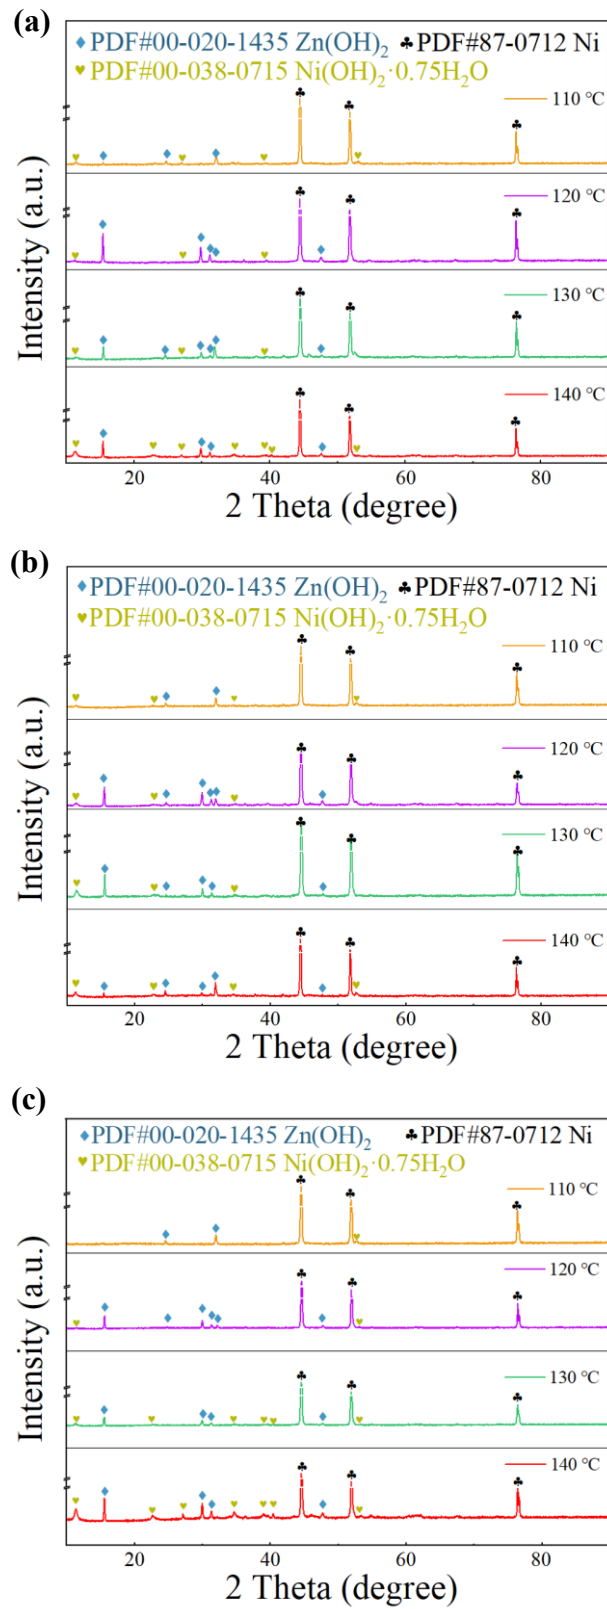

**Fig. S1** X-ray diffraction patterns of (a) HELDH-M/NF, (b) HELDH-C/NF and (c) HELDH-MC/NF

prepared at 110-140 °C.

As is seen in Fig. S1, the three strong peaks at  $44.5^\circ$ ,  $51.8^\circ$  and  $76.4^\circ$  in all the XRD patterns are assigned to the Ni foam substrate (PDF#87-0712) in the synthesized HELDH samples. Moreover, the diffraction peaks of all the three HELDH samples prepared at  $120^\circ\text{C}$  could be well indexed to those of  $\text{Zn}(\text{OH})_2$  phase, implying that  $120^\circ\text{C}$  is the optimal synthesis temperature. This is because the formation energy of a high-entropy structure is generally high, a temperature lower than  $120^\circ\text{C}$  is not high enough for a variety of elements to be integrated into the lattice to form high-entropy hydroxides. However, as the synthesis temperature increases, the diffraction peaks of  $\text{Ni}(\text{OH})_2 \cdot 0.75\text{H}_2\text{O}$  become more and more obviously, because a higher temperature allows more Ni from the Ni foam substrate to continue reacting and forming hydroxide  $\text{Ni}(\text{OH})_2$ .

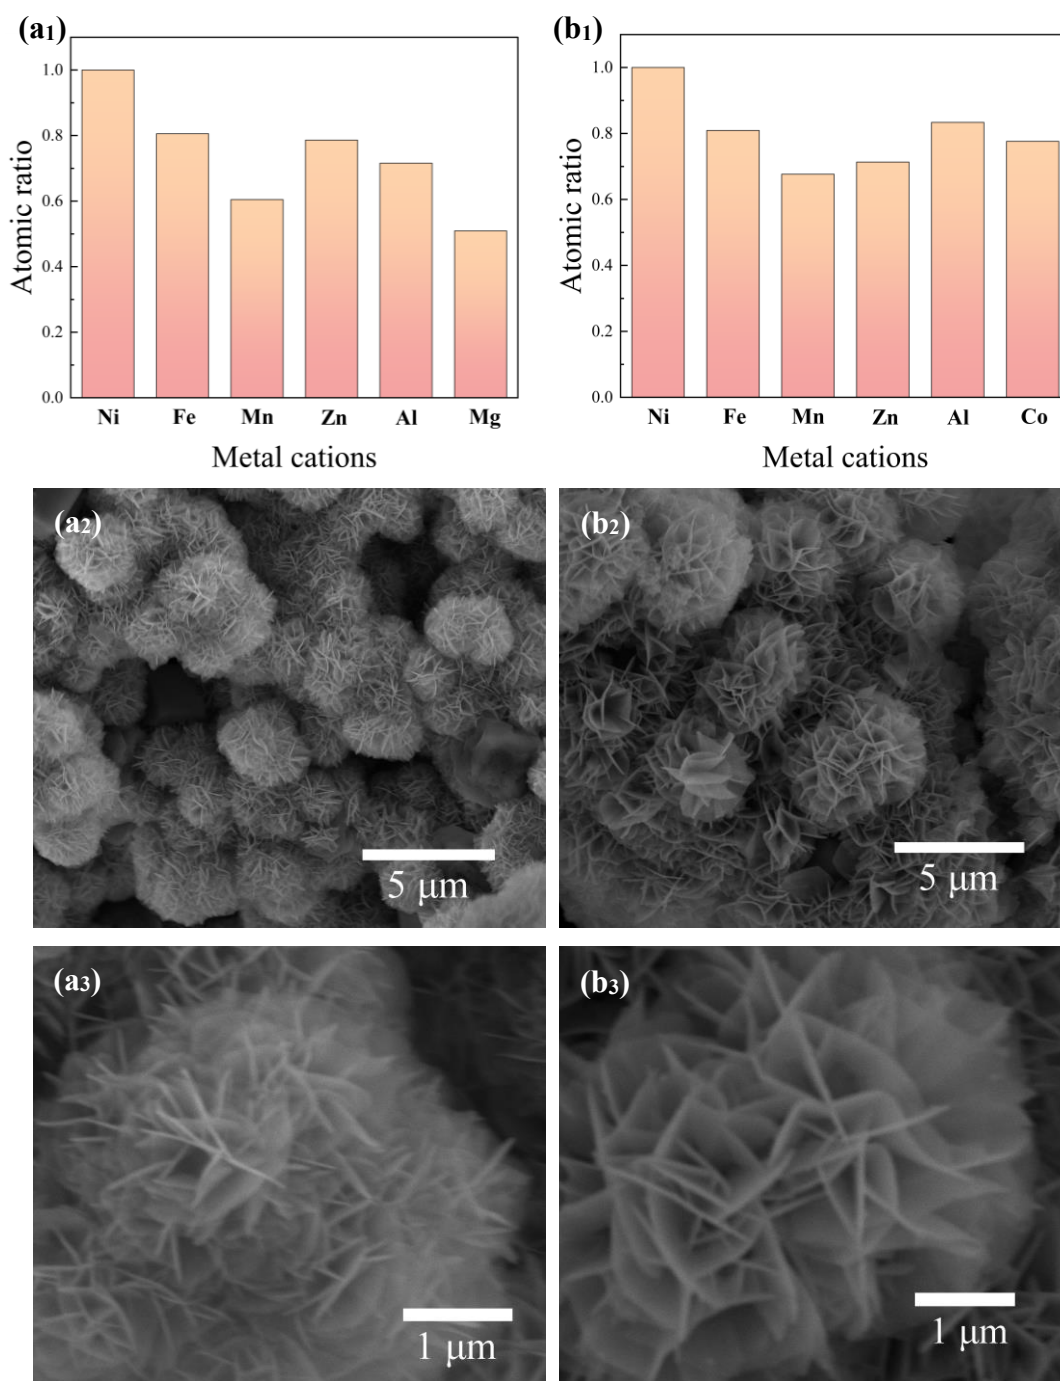

**Fig. S2** Atomic ratios (a<sub>1</sub>, b<sub>1</sub>) measured by ICP technique, low-magnification SEM images (a<sub>2</sub>, b<sub>2</sub>) and high-magnification SEM images (a<sub>3</sub>, b<sub>3</sub>) of HELDH-M (a) and HELDH-C (b), respectively.

As shown in Fig. S2(a<sub>1</sub>, b<sub>1</sub>), the theoretical ratio of the constituent elements (assuming equal atomic proportions) was nearly achieved in the as-synthesized samples. Specifically, it is noted that for the two HELDH samples, the content of Ni is higher than those of the other metal elements,

probably because all the HELDH samples are grown on the Ni foam substrate, which can also provide a small amount of Ni source during the synthesis process. Moreover, from the low-magnification SEM images as shown in Fig. S2(a<sub>2</sub>, b<sub>2</sub>), it is seen that both six-membered HELDH samples are composed of lots of regular nanoflower-like microspheres. From the high-magnification SEM images as shown in Fig. S2(a<sub>3</sub>, b<sub>3</sub>), it is observed that each microsphere indeed consists of a large number of nanosheets, revealing that the two six-element high entropy structures are successfully synthesized.

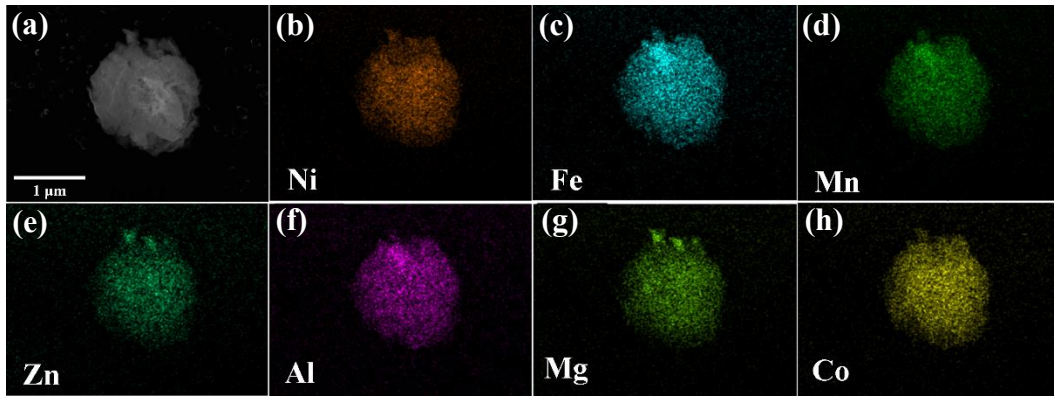

**Fig. S3** SEM-EDX mapping scanning area (a) and (b-h) the recorded mapping images of Ni, Fe, Mn, Zn, Al, Mg, and Co in HELDH-MC sample.

As is seen in **Fig. S3**, the energy dispersive X-ray (EDX) mapping of the HELDH-MC microspheres confirms that the corresponding seven metal elements are uniformly distributed within the nanosheets, which aligns well with the data of ICP-OES. To some extent, this highly elements-dispersive structure guarantees a large configurational entropy of the HELDHs.

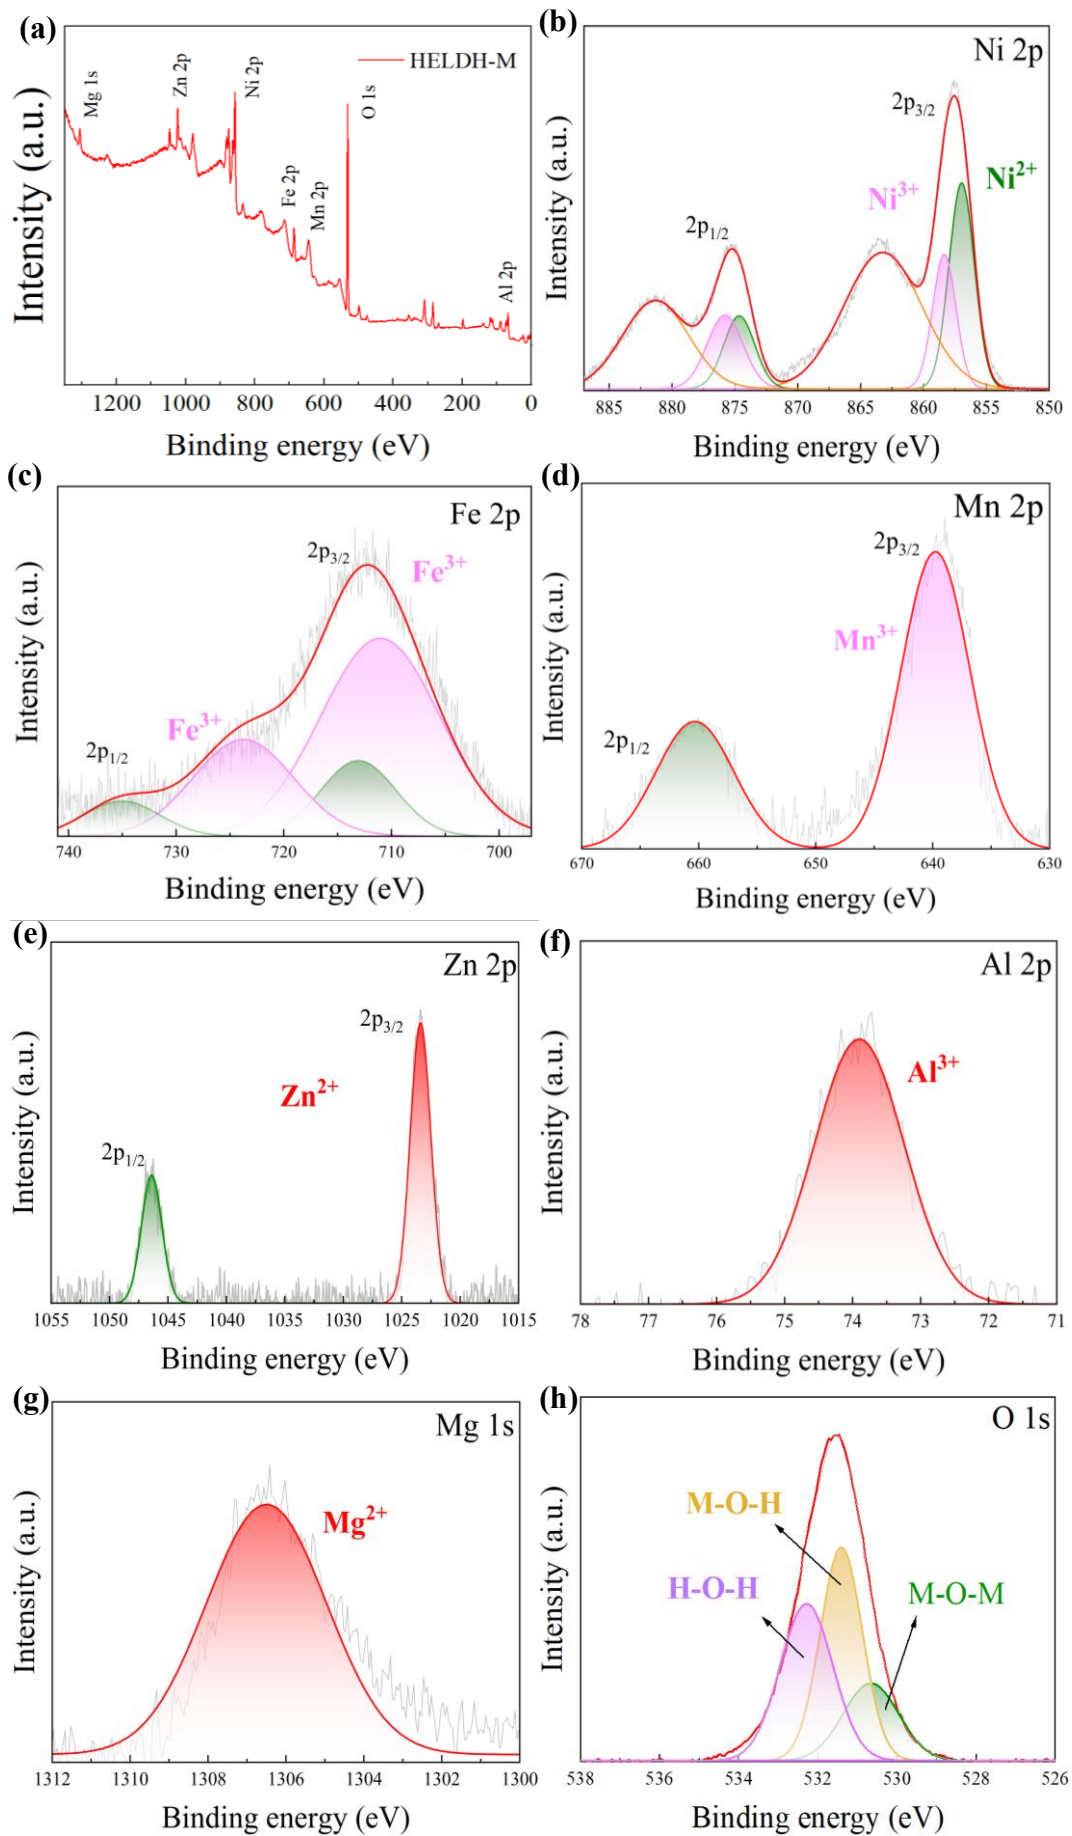

**Fig. S4** XPS data of HELDH-M sample. (a) XPS survey spectrum and the high-resolution spectra of (b) Ni 2p, (c) Fe 2p, (d) Mn 2p, (e) Zn 2p, (f) Al 2p, (g) Mg 1s and (h) O 1s.

As seen in Fig. S4a, the XPS survey spectrum of the optimal HELDH-M confirms the coexistence of Ni, Fe, Mn, Zn, Al, Mg, and O in the sample. In Fig. S4b, the peak fitting of the high-resolution Ni 2p spectrum reveals that the peaks centered at 2p<sub>3/2</sub> (856.9 eV) and 2p<sub>1/2</sub> (874.6 eV) with two shake-up satellites correspond to the presence of Ni<sup>2+</sup> species, while the peaks at 2p<sub>3/2</sub> (858.3 eV) and 2p<sub>1/2</sub> (875.8 eV) with two shake-up satellites are attributed to the presence of Ni<sup>3+</sup> species. The high-resolution Fe 2p spectrum (Fig. S4c) exhibits two broad peaks that can be fitted into four peaks. Among them, Fe 2p<sub>3/2</sub> and Fe 2p<sub>1/2</sub> are located at around 710.9 and 723.8 eV, respectively, indicating that the iron atom in HELDH-M is present as Fe<sup>3+</sup>. For the high-resolution spectrum of Mn 2p (Fig. S4d), the two peaks centered at 639.6 and 660.4 eV can be attributed to Mn 2p<sub>3/2</sub> and Mn 2p<sub>1/2</sub> of Mn<sup>3+</sup> in the sample, respectively. Especially, the spectrum of Mn 2p shows peaks similar to those of MnOOH and Mn<sub>2</sub>O<sub>3</sub>, indicating the presence of Mn<sup>3+</sup> in the product. As seen in Fig. S4e for the high-resolution spectrum of Zn 2p, there are two sharp peaks located at 1023.1 (Zn 2p<sub>3/2</sub>) and 1047.2 eV (Zn 2p<sub>1/2</sub>), respectively, where the Zn 2p<sub>3/2</sub> spectrum can be attributed to Zn<sup>2+</sup>. The high-resolution spectrum of Al 2p (Fig. S4f) shows a strong, sharp peak at 73.9 eV, which can be indexed to Al 2p<sub>3/2</sub> of Al<sup>3+</sup> in the sample. For the high-resolution XPS spectrum of Mg 1s (Fig. S4g), the only strong peak centered at 1306.5 eV is attributed to the bivalent state of Mg<sup>2+</sup>. In addition, the broad peak in the high-resolution spectrum of O 1s (Fig. S4h) results from the combination of two individual peaks at 531.4 and 530.65 eV, which correspond to the appearance of O-containing groups with M-O-H and M-O-M structures, respectively.



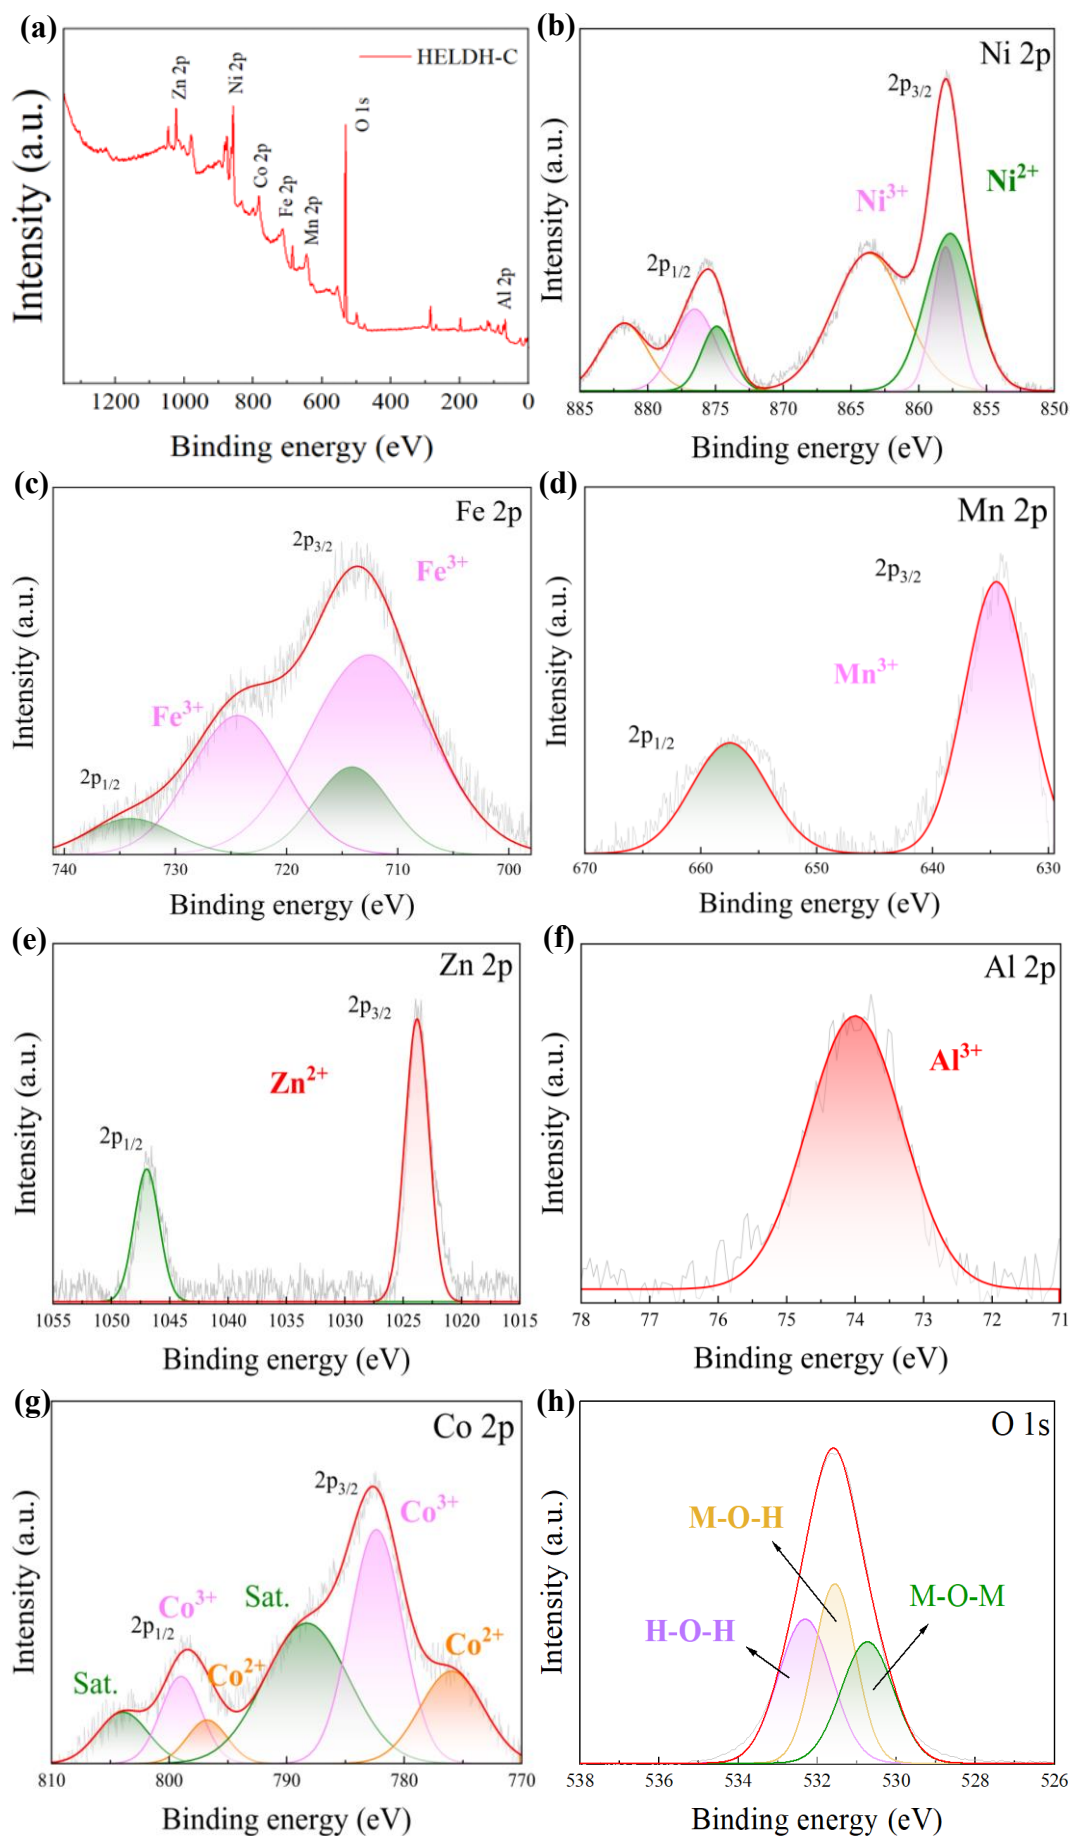

**Fig. S5** XPS data of HELDH-C sample. (a) XPS survey spectrum and the high-resolution spectra of (b) Ni 2p, (c) Fe 2p, (d) Mn 2p, (e) Zn 2p, (f) Al 2p, (g) Co 2p and (h) O 1s.

As shown in Fig. S5a, the XPS survey spectrum of the optimal HELDH-C indicates the coexistence of Ni, Fe, Mn, Zn, Al, Co, and O in the sample. In Fig. S5b, the peak fitting of high-resolution Ni 2p spectrum reveals that the peaks centered at 2p<sub>3/2</sub> (857.6 eV) and 2p<sub>1/2</sub> (874.9 eV) with two shakeup satellites are attributed to the presence of Ni<sup>2+</sup> species, while the peaks at 2p<sub>3/2</sub> (858 eV) and 2p<sub>1/2</sub> (876.5 eV) with two shakeup satellites are due to the presence of Ni<sup>3+</sup> species. The high-resolution Fe 2p spectrum (Fig. S5c) presents two broad peaks that can be deconvoluted into four peaks. Among them, Fe 2p<sub>3/2</sub> and Fe 2p<sub>1/2</sub> are located at around 712.8 and 724.9 eV, respectively, indicating that the iron atom in HELDH-C is present as Fe<sup>3+</sup>. For the high-resolution spectrum of Mn 2p (Fig. S5d), the two peaks centered at 634.5 and 657.6 eV can be attributed to Mn 2p<sub>3/2</sub> and Mn 2p<sub>1/2</sub> of Mn<sup>3+</sup> in the sample. Especially, the spectrum of Mn 2p shows peaks similar to those of MnOOH and Mn<sub>2</sub>O<sub>3</sub>, indicating the presence of Mn<sup>3+</sup> in the product. As seen in Fig. S5e for the high-resolution spectrum of Zn 2p, there are two sharp peaks located at 1023.2 (Zn 2p<sub>3/2</sub>) and 1047.8 eV (Zn 2p<sub>1/2</sub>), respectively, where the Zn 2p<sub>3/2</sub> spectrum can be attributed to Zn<sup>2+</sup>. For the high-resolution spectrum of Al 2p (Fig. S5f), the strong, sharp peak at 74 eV is indexed to Al 2p<sub>3/2</sub> of Al<sup>3+</sup> in the sample. In Fig. S5g, two peak components can be fitted with the Co 2p<sub>3/2</sub> and Co 2p<sub>1/2</sub>, indicating the existence of the Co<sup>2+</sup> and Co<sup>3+</sup> in the sample. In addition, the broad peak in the high-resolution spectrum of O 1s (Fig. S5h) is due to the combination of two individual peaks at 531.7 and 530.7 eV, which are correlated to the appearance of O-containing groups with M–O–H and M–O–M structures, respectively.

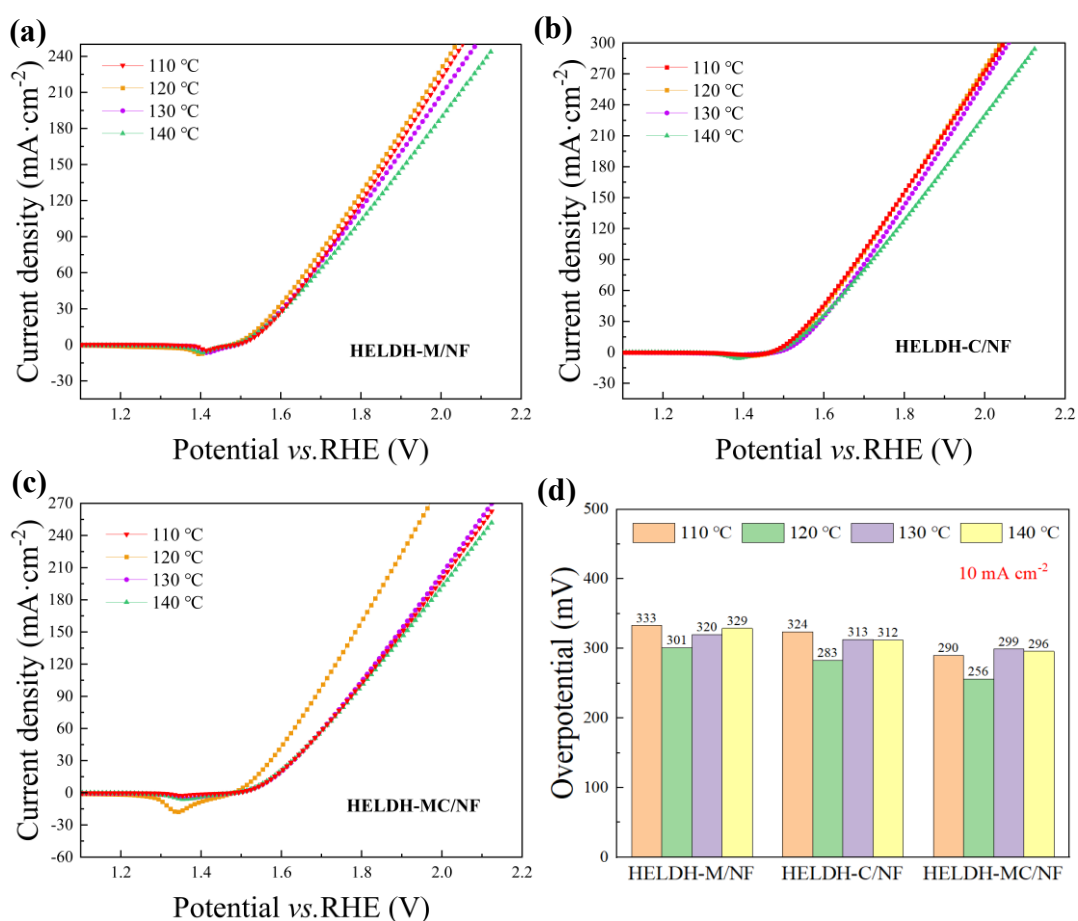

**Fig. S6** Polarization curves of (a) HELDH-M/NF, (b) HELDH-C/NF and (c) HELDE-MC/NF prepared at different temperatures. (d) The required overpotentials at 10 mA cm<sup>-2</sup>.

The oxygen evolution performances of HELHD-M/NF, HELHD-C/NF, and HELDH-MC/NF synthesized at different temperatures are shown in Fig. S6(a–c). The comparison on the required overpotentials is exhibited directly in Fig. S6d. It can be seen that regardless of the type of HELDH, the samples synthesized at 120 °C show the best oxygen evolution performance, which is consistent with the XRD results. It can also be observed that the performance of HELDH-MC/NF is better than those of the other two hexahydroxy HELDH samples, which may be due to the synergistic effect between the elements.

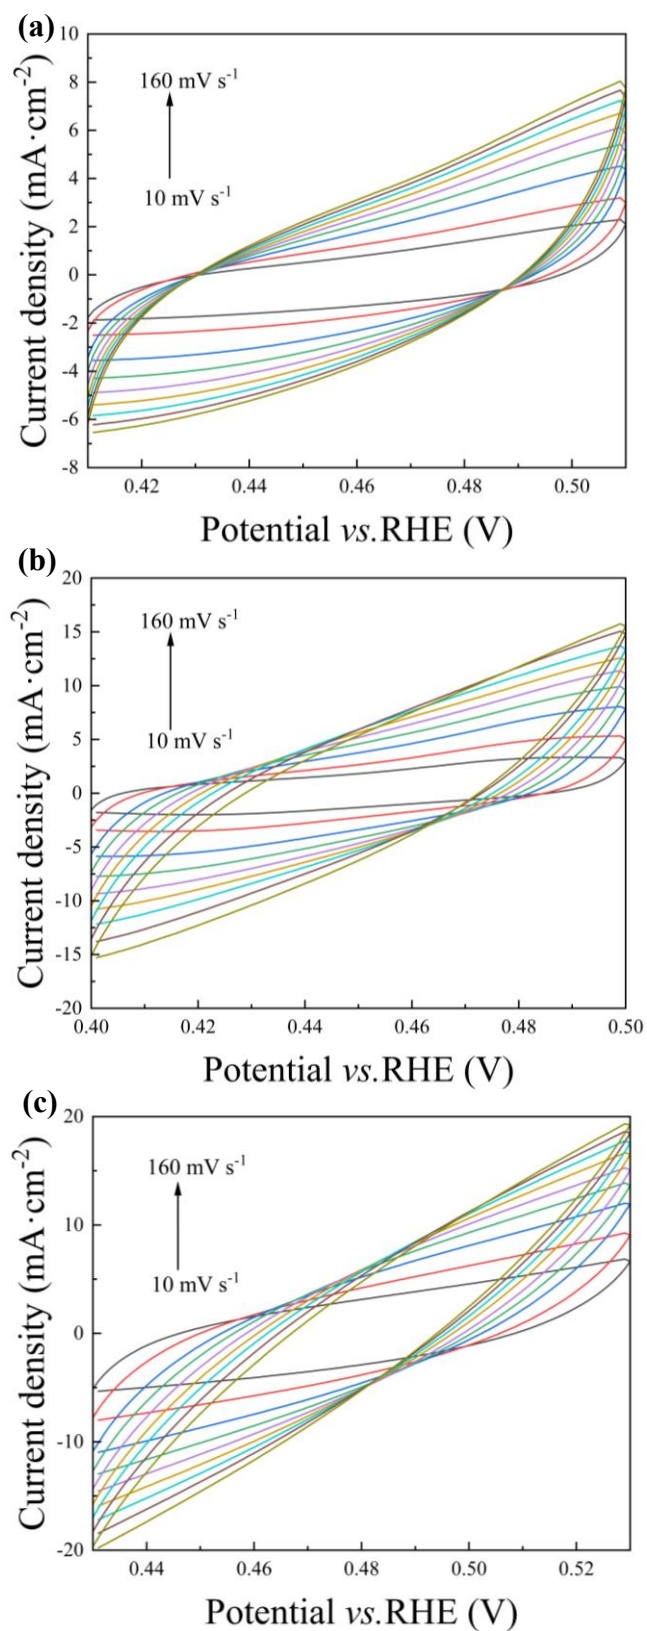

**Fig. S7** Cyclic voltammograms of (a) HELDH-M/NF, (b) HELDH-C/NF and (c) HELDH-MC/NF.

In order to obtain ECSA, CV tests were conducted on HELDHs at 10–160  $\text{mV s}^{-1}$ .

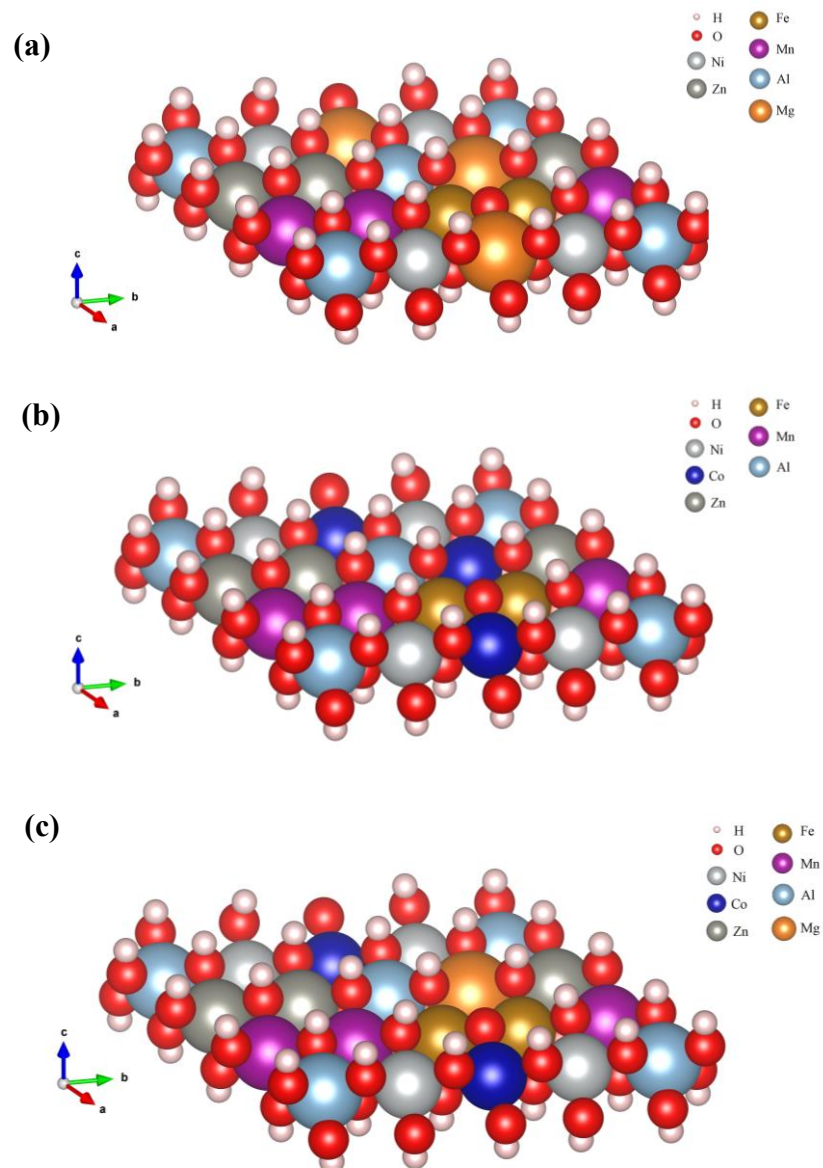

**Fig. S8** The optimized structures of (a) HELDH-M, (b) HELDH-C, and (c) HELDH-MC.

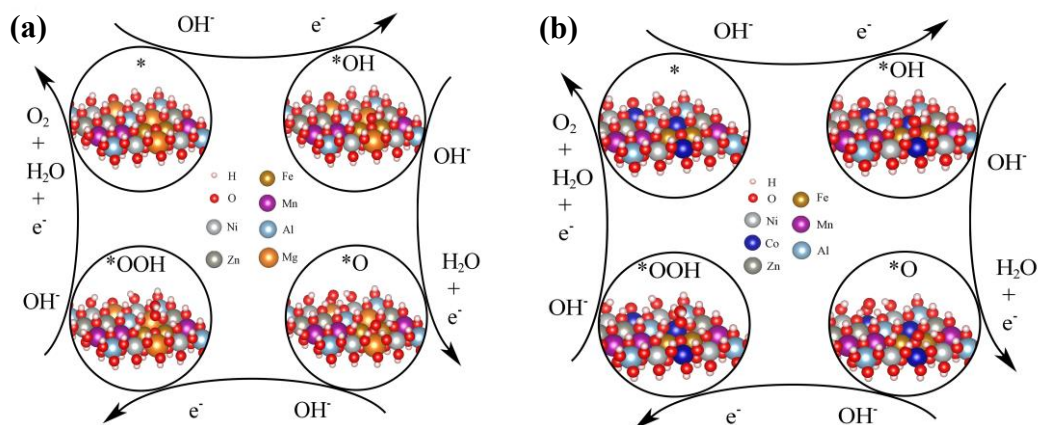

**Fig. S9** OER processes on the surface of (a) HELDH-M, and (b) HELDH-C catalysts.

**Table S1** DFT calculated energy, zero-point energy, entropy, and Gibbs free energy of the gas phase molecules considered in this work.

| Molecule         | E/eV   | ZPE/eV | -TS/eV | G/eV   |
|------------------|--------|--------|--------|--------|
| H <sub>2</sub> O | -14.22 | 0.58   | -0.67  | -14.31 |
| H <sub>2</sub>   | -6.77  | 0.27   | -0.40  | -6.90  |

**Table S2** DFT calculated zero-point energy of the intermediates onto different models in this work.

| DFT models | $\Delta E_{ZPE}(H_2O^*)$ | $\Delta E_{ZPE}(OH^*)$ | $\Delta E_{ZPE}(O^*)$ | $\Delta E_{ZPE}(OOH^*)$ |
|------------|--------------------------|------------------------|-----------------------|-------------------------|
| HELDH-C    | 0.5944                   | 0.3485                 | 0.0668                | 0.3689                  |
| HELDH-M    | 0.5810                   | 0.3602                 | 0.0695                | 0.3862                  |
| HELDH-MC   | 0.7939                   | 0.3472                 | 0.0662                | 0.3625                  |

**Table S3** The changes of Gibbs free energy of H/O containing intermediates and calculated theoretical overpotentials for OER at 0 V.

| DFT models | $\Delta G_{\text{OH}^*}$<br>(eV) | $\Delta G_{\text{O}^*}$<br>(eV) | $\Delta G_{\text{OOH}^*}$<br>(eV) | $\Delta G_1$<br>(eV) | $\Delta G_2$<br>(eV) | $\Delta G_3$<br>(eV) | $\Delta G_4$<br>(eV) | $\eta_{\text{t,OER}}$<br>(V) |
|------------|----------------------------------|---------------------------------|-----------------------------------|----------------------|----------------------|----------------------|----------------------|------------------------------|
| HELDH-C    | 3.03                             | 2.94                            | 4.48                              | 3.03                 | -0.09                | 1.54                 | 0.48                 | 1.80                         |
| HELDH-M    | 3.32                             | 2.88                            | 4.50                              | 3.32                 | -0.45                | 1.63                 | 0.46                 | 2.09                         |
| HELDH-MC   | 1.80                             | 2.25                            | 3.79                              | 1.80                 | 0.45                 | 1.54                 | 1.17                 | 0.57                         |

**Table S4** The changes of Gibbs free energy of H/O containing intermediates for OER at 1.23 V.

| DFT models | $\Delta G_{\text{OH}^*}$<br>(eV) | $\Delta G_{\text{O}^*}$<br>(eV) | $\Delta G_{\text{OOH}^*}$<br>(eV) | $\Delta G_1$<br>(eV) | $\Delta G_2$<br>(eV) | $\Delta G_3$<br>(eV) | $\Delta G_4$<br>(eV) |
|------------|----------------------------------|---------------------------------|-----------------------------------|----------------------|----------------------|----------------------|----------------------|
| HELDH-C    | 1.80                             | 0.48                            | 0.79                              | 1.80                 | -1.32                | 0.31                 | -0.75                |
| HELDH-M    | 2.09                             | 0.42                            | 0.81                              | 2.09                 | -1.68                | 0.40                 | -0.77                |
| HELDH-MC   | 0.57                             | -0.21                           | 0.1                               | 0.57                 | -0.78                | 0.31                 | -0.06                |
